# Supplementary material
Source: HighWire-hosted journal article supplement (https://bmjopen.bmj.com/content/14/3/e074920)
Supplement: inline-supplementary-material-1 [file inline-supplementary-material-1.pdf]

**PubMed Search strategy:**

| Concept                    |                                                                                                                                                                                                                                                                                                                                                                                                                                                                                                                                                                                                                                                                                                                           | Search results |
|----------------------------|---------------------------------------------------------------------------------------------------------------------------------------------------------------------------------------------------------------------------------------------------------------------------------------------------------------------------------------------------------------------------------------------------------------------------------------------------------------------------------------------------------------------------------------------------------------------------------------------------------------------------------------------------------------------------------------------------------------------------|----------------|
| #1 Community health worker | "Community Health Workers"[MeSH] OR "Promotoras de salud" OR "promotoras" OR "community health worker"[Text Word] OR "community health aide"[Text Word] OR "community health provider"[Text Word] OR "frontline health worker"[Text Word] OR "lay health worker"[Text Word] OR "Accredited Social Health Activist"[Text Word] OR "ASHA"[Text Word] OR "rural health worker"[Text Word] OR "village health worker"[Text Word] OR "community health volunteer"[Text Word] OR "community health agent"[Text Word] OR "multipurpose health worker"[Text Word] OR "health extension worker"[Text Word] OR "lady health worker"[Text Word]                                                                                      | 9337           |
| #2 COVID 19                | "COVID-19"[MeSH ] OR "Coronavirus"[Mesh] OR "Coronavirus Infections"[Mesh] OR "severe acute respiratory syndrome coronavirus 2" [Supplementary Concept] OR coronavirus OR "corona virus" OR coronavirinae OR coronaviridae OR betacoronavirus OR covid19 OR "covid 19" OR nCoV OR "CoV 2" OR CoV2 OR sarscov2 OR 2019nCoV OR "novel CoV" OR "wuhan virus"                                                                                                                                                                                                                                                                                                                                                                 | 356158         |
| #3 qualitative research    | "qualitative research"[MeSH Terms] OR "focus groups"[MeSH Terms] OR "interviews as topic"[MeSH Terms] OR "semi-structured"[TIAB] OR semistructured[TIAB] OR unstructured[TIAB] OR informal[TIAB] OR "in-depth"[TIAB] OR indepth[TIAB] OR "face-to-face"[TIAB] OR structured[TIAB] OR guide[TIAB] OR guides[TIAB] OR interview*[TIAB] OR discussion*[TIAB] OR questionnaire*[TIAB] OR "focus group"[TIAB] OR "focus groups"[TIAB] OR qualitative[TIAB] OR ethnograph*[TIAB] OR fieldwork[TIAB] OR "field work"[TIAB] OR "key informant"[TIAB] OR "interviews as topic"[Mesh] OR "focus groups"[Mesh] OR narration[Mesh] OR qualitative research[Mesh] OR "personal narratives as topic"[Mesh] OR "lived experience" [TIAB] | 1978429        |
| #4                         | #1 AND #2 AND #3                                                                                                                                                                                                                                                                                                                                                                                                                                                                                                                                                                                                                                                                                                          | 99             |
